# Supplementary material for: GFP-related chromophores: photoisomerization, thermal reversion, and DNA labelling
Source: Royal Society of Chemistry journal article supplement (doi:10.1039/d3cp01655b), 2023-01-01
Supplement: d3cp01655b1.pdf [file d3cp01655b1.pdf]

# Supporting Information

## GFP- related Chromophores: Photoisomerization, Thermal Reversion, and DNA Labelling

Martin S. Faillace<sup>a,b</sup>, Ekaterina A. Dolgoplova<sup>b</sup>, Noelia M. Ceballos<sup>a</sup>, E. Nahir Ruiz Pereyra<sup>a</sup>,  
Lucia Lanfri<sup>a</sup>, Gustavo A. Argüello<sup>a</sup>, Maximiliano Burgos Paci<sup>a</sup>, Natalia B. Shustova<sup>b</sup>, Walter J.  
Peláez<sup>\*,a</sup>.

<sup>a</sup>INFIQC-CONICET-Dpto. de Fisicoquímica, Facultad de Ciencias Químicas, Universidad Nacional de Córdoba,  
Ciudad Universitaria, Córdoba, X5000HUA, Argentina

<sup>b</sup> Department of Chemistry and Biochemistry, University of South Carolina, Columbia, South Carolina 29208,  
United States.

### Table of contents

### Page number

|                                                               |    |
|---------------------------------------------------------------|----|
| 1. Mechanistic study .....                                    | 2  |
| 2. Hydrolysis of 2a.....                                      | 3  |
| 3. Yield determinations of 2a-c by HPLC .....                 | 4  |
| 4. Chemical characterization of synthesized compounds .....   | 4  |
| 5. <sup>1</sup> H-NMR spectra in the photoisomerization ..... | 11 |
| 6. Thermal reversion.....                                     | 13 |
| 7. Equations employed in the data analysis .....              | 14 |
| 8. Energy from B3LYP/6-311+G(d,p) and CAS(6/5)/6-31g(d).....  | 14 |

# 1. Mechanistic study

The formation of *Z*-6-benzylidene-2,3-dihydroimidazo[2,1-*b*]thiazol-5(6*H*)-one **2a** can be postulated considering two different paths, Scheme S1. The nucleophilic attack to the alkyl group can be initiated either by the thiol group or the nitrogen lone pair, path A and B, respectively. To address this question, a reaction with 1-bromoethane was performed with **1a**. If the reaction occurs via the nitrogen, the compound **1aNethyl** shown in Scheme S2 should be detected. Whilst if the nucleophilic attack occurs via the sulfur atom, the compound **1aSethyl** would be detected.

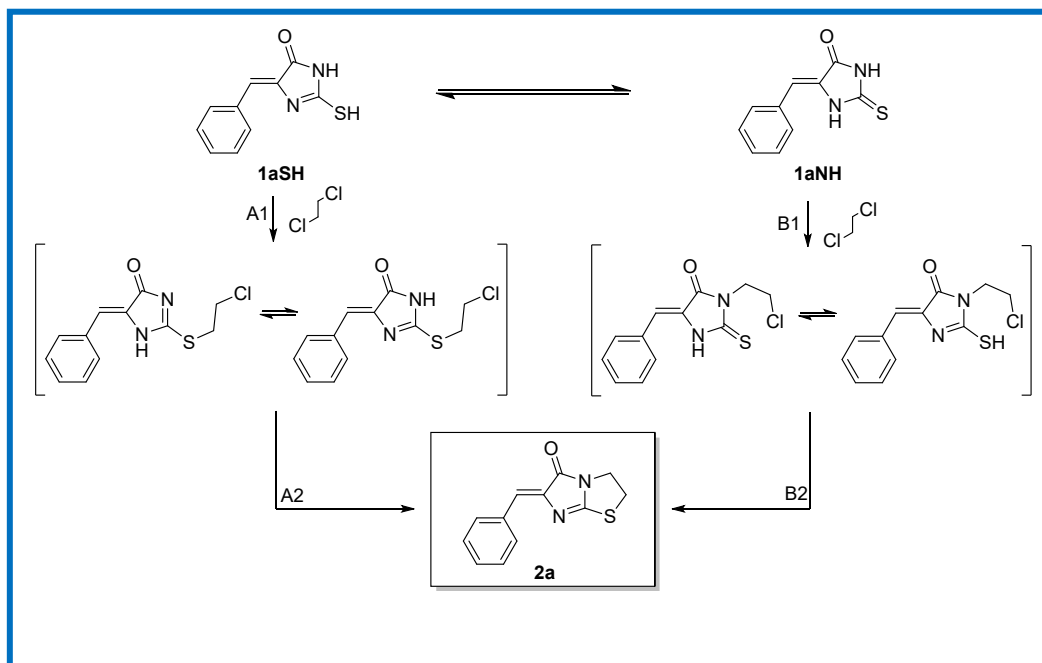

After completing the reaction with 1-bromoethane (Scheme S2) the compound **4** resulted as the main product of this synthesis. Additionally, a sub-product **5** was detected, which incorporated two ethyl groups. These compounds were elucidated by <sup>1</sup>H-NMR and GC-MS analyses, as described in Figures S1 and S2, respectively.

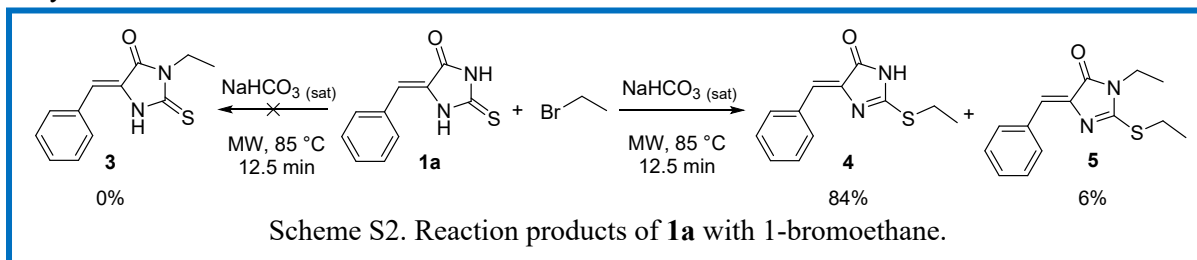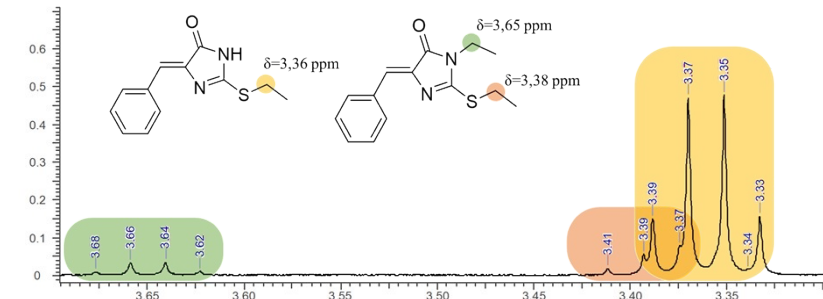

Figure S1. <sup>1</sup>H-NMR of the reaction product of illustrated in Scheme 3.

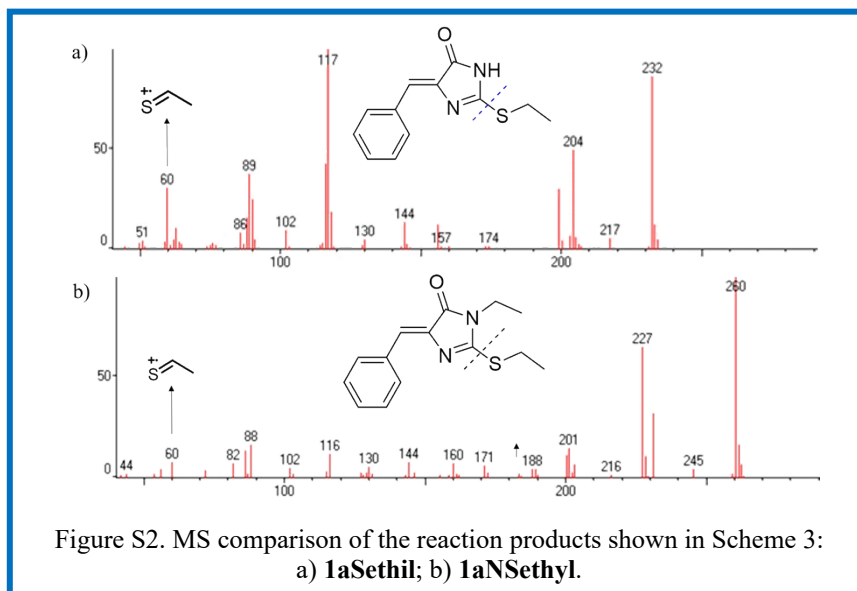

## 2. Hydrolysis of 2a

The synthesis of compound **2a** can be carried out by two different pathways. One of them consisted of a two-reaction step, where the second step starts from compound **1a**. In this synthesis, we detected the hydrolysis of the desired compound, **2a**, and some attempts varying the microwave conditions were done to diminish the formation of this sub-product (**2a+H<sub>2</sub>O**).

The relative quantities of the reaction products varying the microwave conditions are summarized in Figure S3. We explored the synthesis at 85, 115 and 150 °C and two reaction times, 12.5 and 30 min, Figure S3a and S3b, respectively. The quantification was performed by GC. From the results, we could conclude that the hydrolysis is rather ruled by changes in the temperature than the reaction time. The best condition, where the amount of **2a+H<sub>2</sub>O** was the least, was at 115 °C and 12.5 min, as denoted with an arrow in Figure S3a.

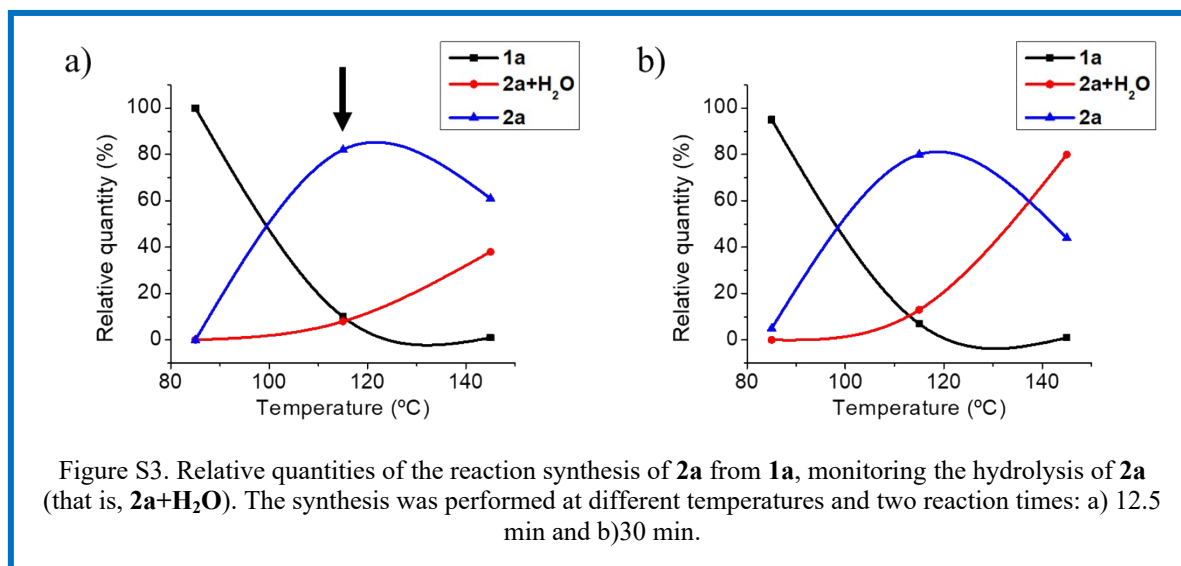

### 3. Yield determinations of 2a-c by HPLC

Elution was performed with a mixture of MeOH:H<sub>2</sub>O (90:10) at a flow rate of 0.8 mL min<sup>-1</sup>. The retention times under these conditions were: **2a** (5.4 min); **2b** (6.5 min); **2c** (4.8 min).

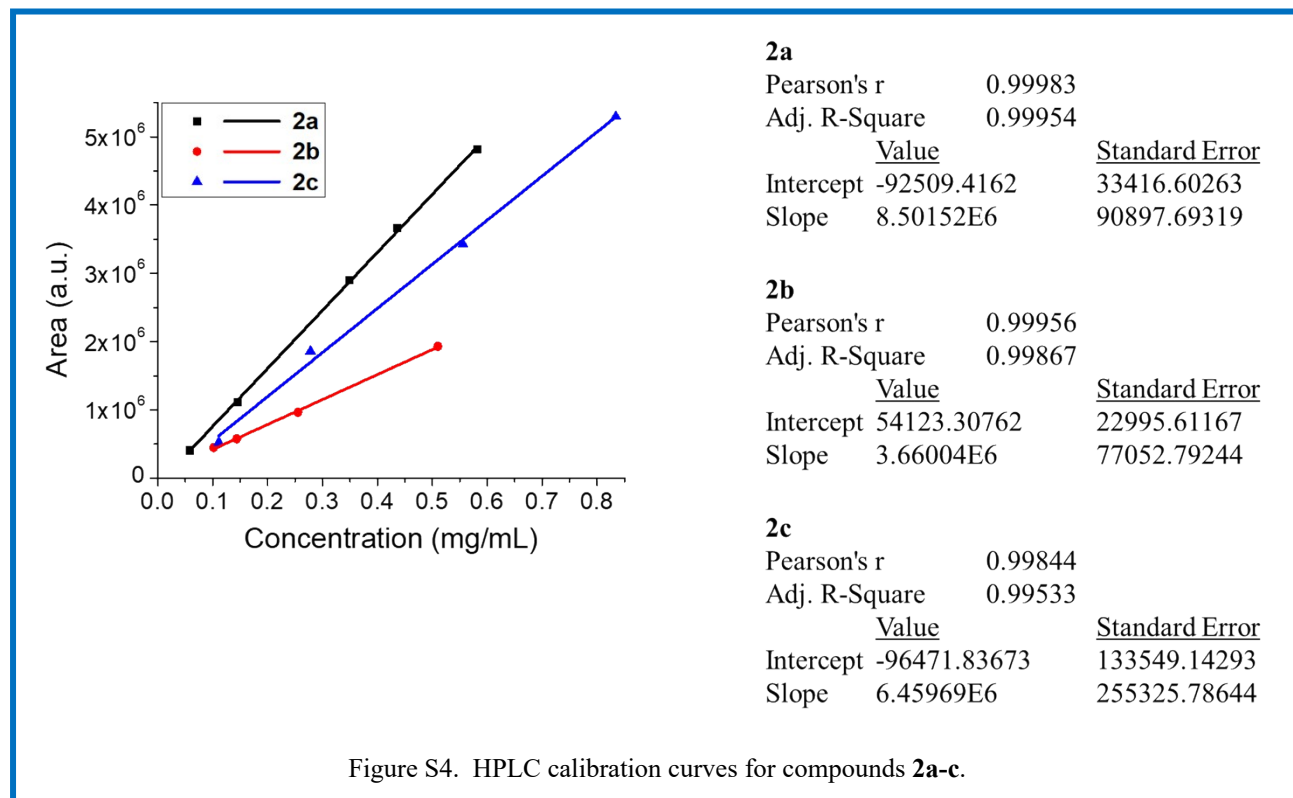

### 4. Chemical characterization of synthesized compounds

#### Compound 1a. 5-benzylidene-2-thioxoimidazolidin-4-one

<sup>1</sup>H-NMR (400.16 MHz, acetone-d<sub>6</sub>, 22 °C) δ (ppm): 6.57 (s, 1H); 7.42 (m, 3H); 7.72 (d; *J*<sub>H</sub>=7.15 Hz; 2H).

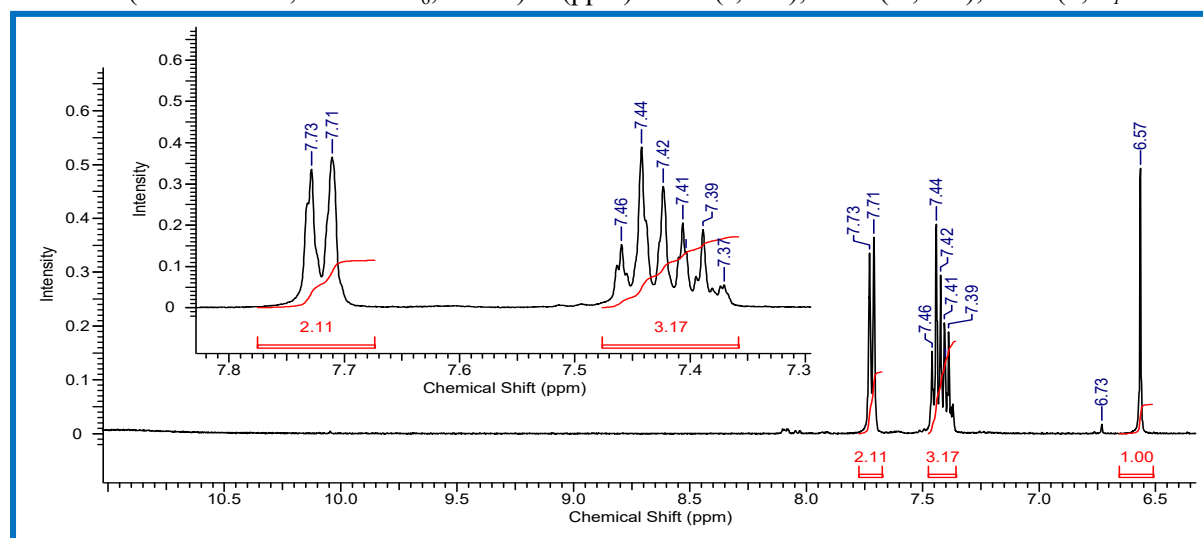

$^{13}\text{C}$ -NMR (100.56 MHz, acetone- $d_6$ )  $\delta$  (ppm): 112.04; 129.17; 129.78; 130.00; 130.57; 165.80; 179.82.

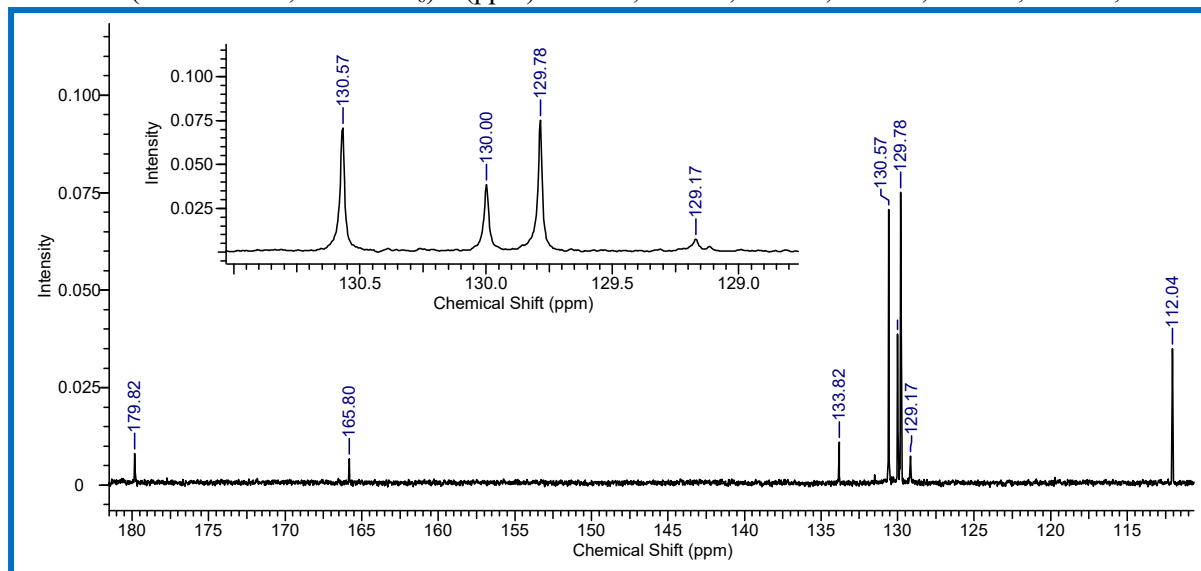

### Compound 1b. 5-(4-methylbenzylidene)-2-thioxoimidazolidin-4-one

$^1\text{H}$ -NMR (400.16 MHz, DMSO- $d_6$ , 22 °C)  $\delta$  (ppm): 2.33 (s, 3H); 6.45 (s, 1H); 7.24 (d;  $J_f=8.10$  Hz; 2H); 7.66 (d;  $J_f=8.10$  Hz; 2H), 12.20 ( $s_{\text{exchanges}}$ , 2H).

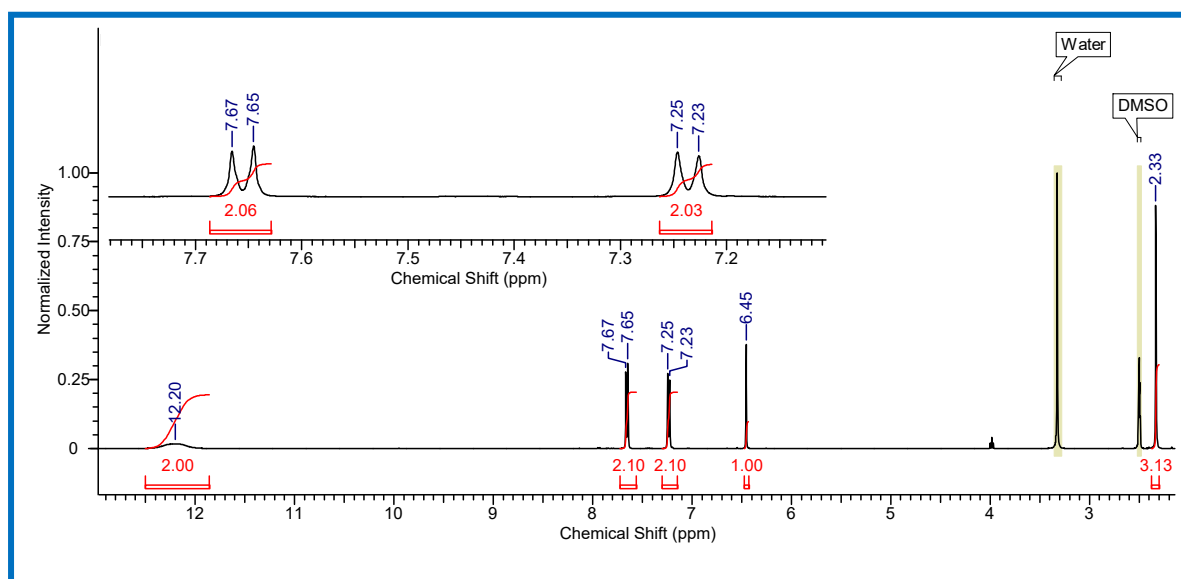

$^{13}\text{C}$ -NMR (100.56 MHz, acetone- $d_6$ )  $\delta$  (ppm): 21.00; 111.81 (2C); 127.00; 129.41 (2C); 130.19 (2C); 139.24; 165.95; 178.95.

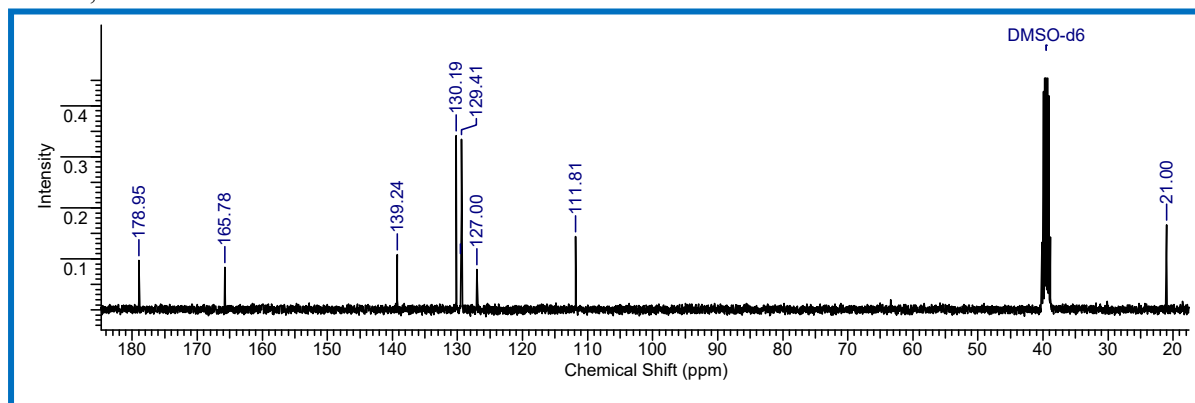

**Compound 1c.** 5-(4-fluorobenzylidene)-2-thioxoimidazolidin-4-one

$^1\text{H-NMR}$  (400.16 MHz,  $\text{DMSO-}d_6$ , 22 °C)  $\delta$  (ppm): 6.50 (s, 1H); 7.26 (t;  $J_1=8.92$  Hz; 2H); 7.81 (dd;  $J_1=8.92$  Hz;  $J_2=5.58$  Hz; 2H).

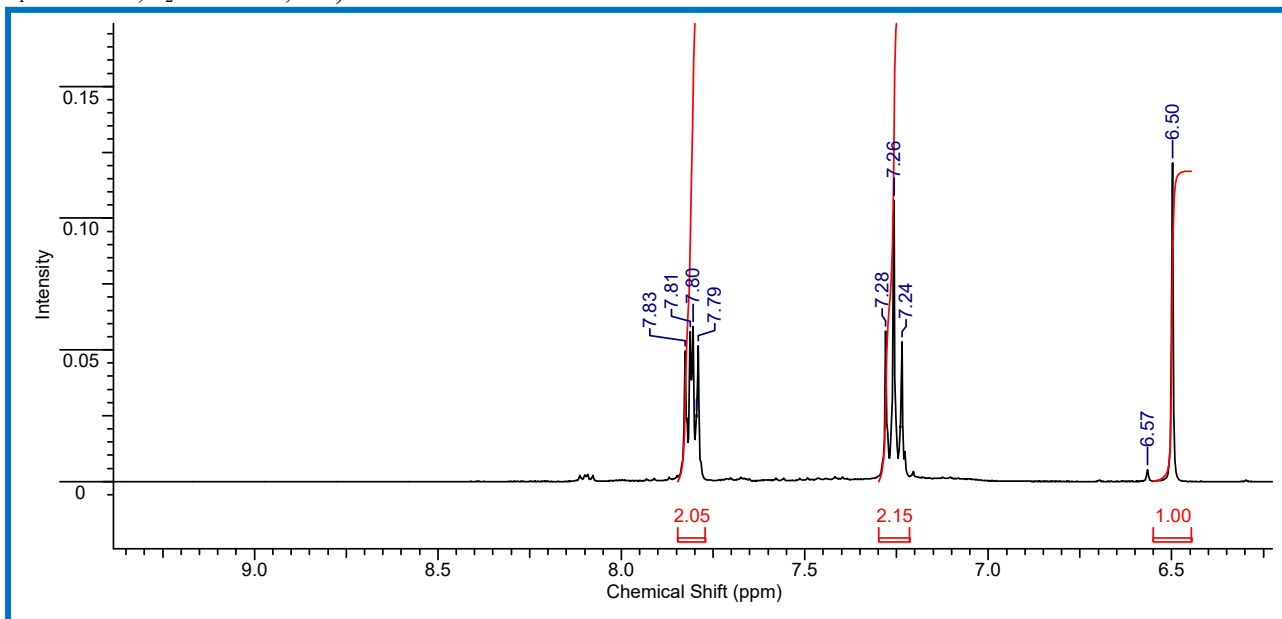

$^{13}\text{C-NMR}$  (100.56 MHz,  $\text{DMSO-}d_6$ )  $\delta$  (ppm): 110.47; 115.84 ( $J_2^{C-F}=21.61$  Hz; 2C); 127.75; 129.00; 132.51 ( $J_3^{C-F}=8.18$  Hz; 2C); 162.38 ( $J_1^{C-F}=248.74$  Hz); 165.78; 179.31.

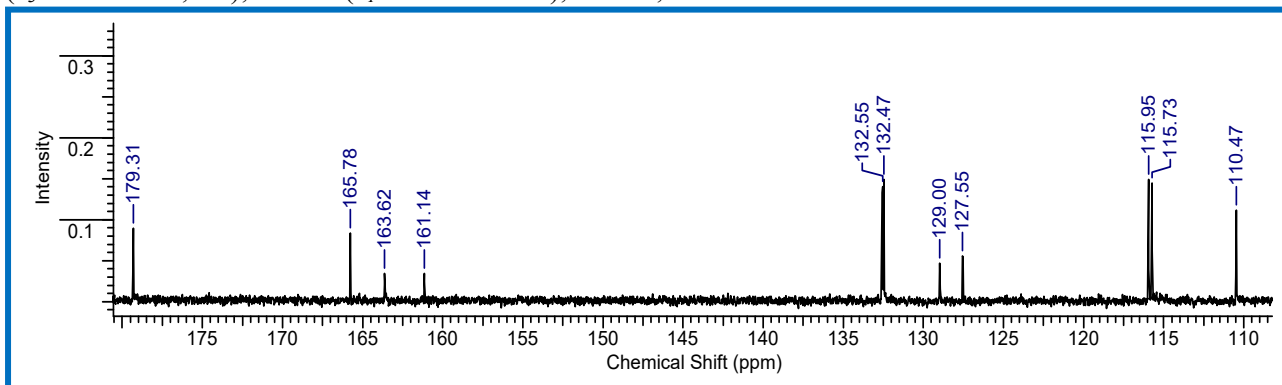

$^{19}\text{F-NMR}$  (376.53 MHz;  $\text{DMSO-}d_6$ )  $\delta$  (ppm): -110.82.

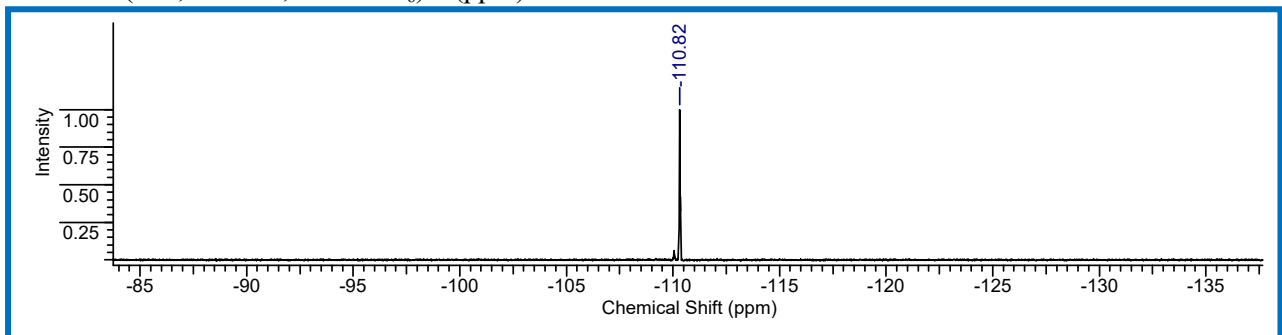

**Compound 2a.** 6-benzylidene-2,3-dihydroimidazo[2,1-*b*]thiazol-5(6*H*)-one

GC-MS (200 to 250 °C, 10 °C/min; Retention time: 11.278 min):  $m/z$  (%) = 231 (M+1, 15), 230 (M<sup>+</sup>, 100), 229 (18), 203 (10), 202 (63), 201 (23), 174 (12), 142 (15), 116 (72), 115 (11), 90 (9), 89 (30), 86 (13), 63 (10), 60 (11).

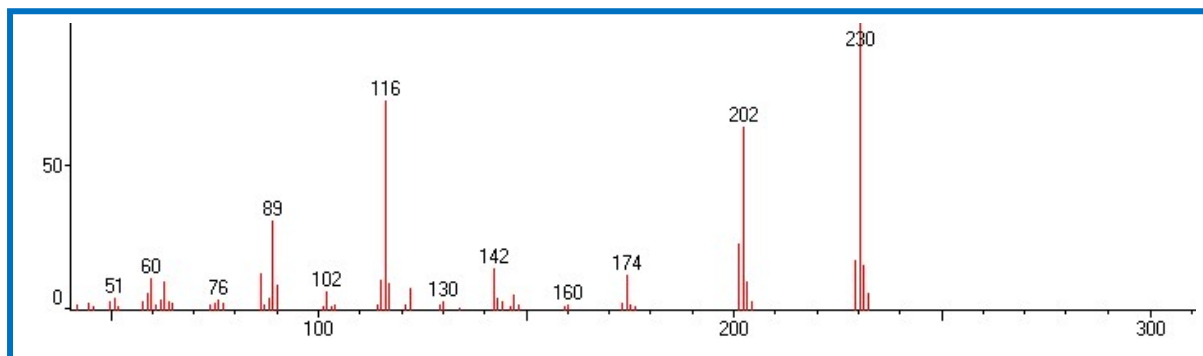

<sup>1</sup>H-NMR (400.16 MHz, CDCl<sub>3</sub>, 22°C)  $\delta$  (ppm): 3.95 (t,  $J=7.07$  Hz, 2H); 3.75 (t,  $J=7.07$  Hz, 2H); 6.91 (s, 1H); 7.37 (m, 3H); 8.05 (d;  $J=8.50$  Hz, 2H).

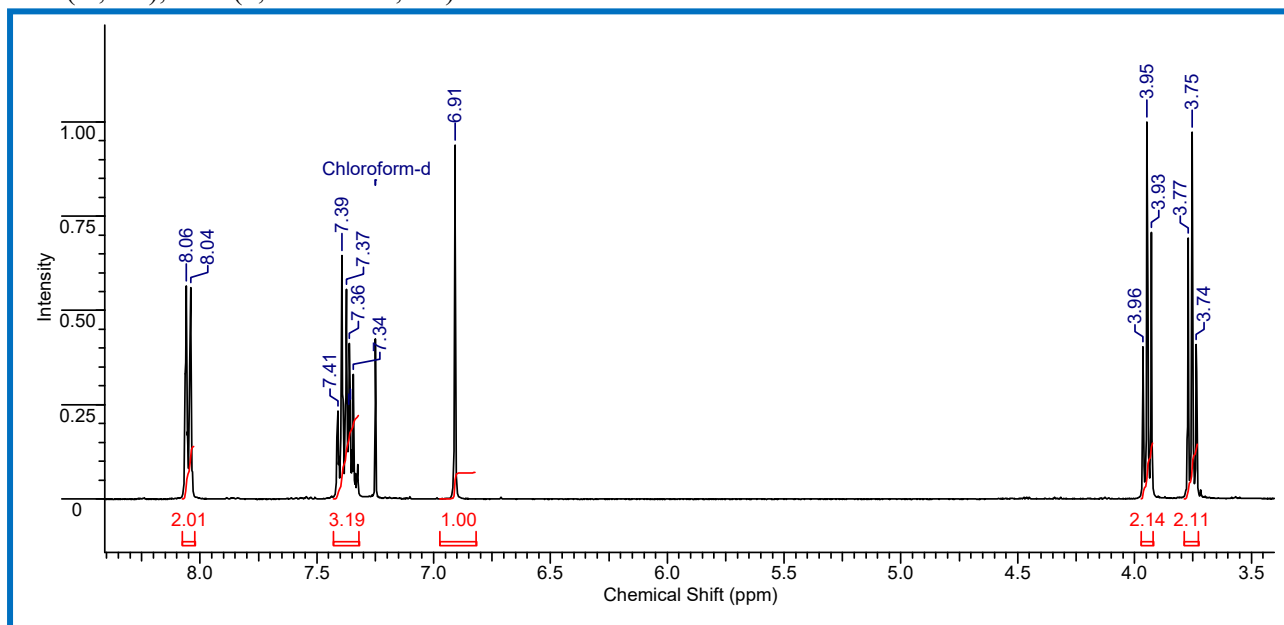

<sup>13</sup>C-NMR (100.56 MHz, CDCl<sub>3</sub>)  $\delta$  (ppm): 34.21; 40.78; 124.90; 128.67 (2C); 129.94; 131.72 (2C); 133.51; 144.51; 166.75; 169.61.

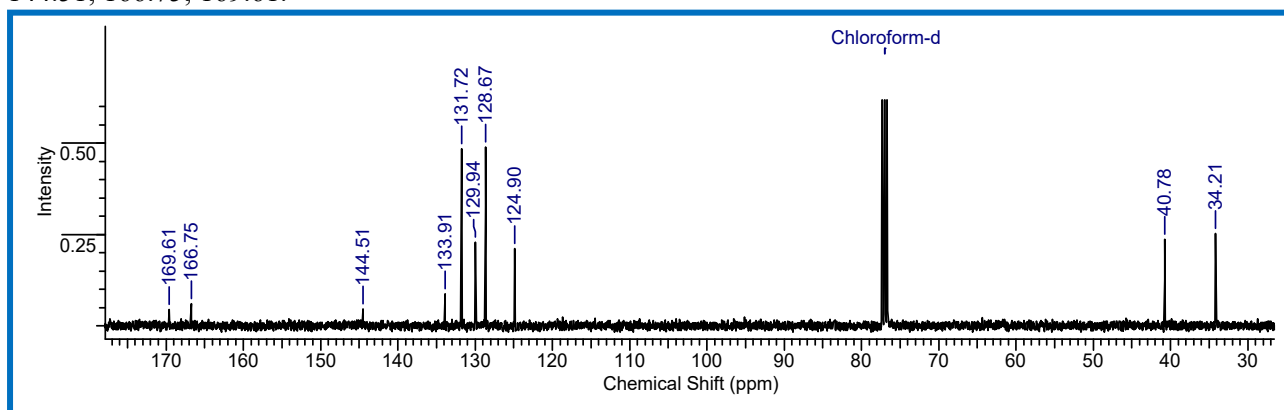

UV-Vis (ACN):  $\epsilon_{356} = 2.70 \cdot 10^4 \text{ M}^{-1} \text{ cm}^{-1}$ .

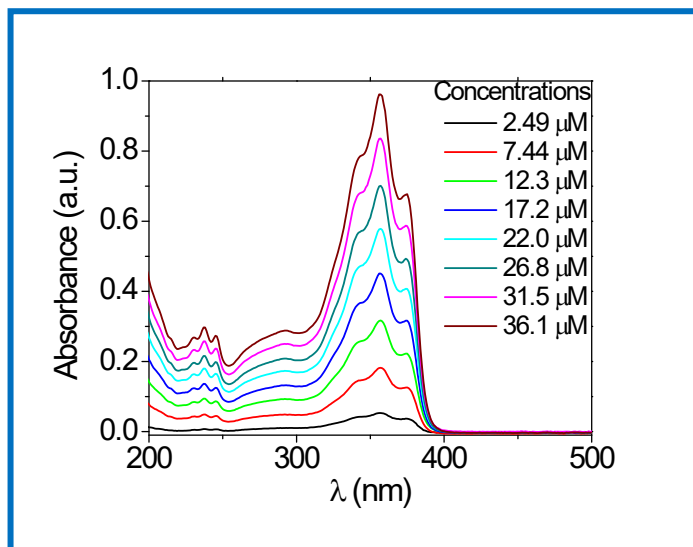

**Compound 2b.** 6-(4-methylbenzylidene)-2,3-dihydroimidazo[2,1-*b*]thiazol-5(6*H*)-one

GC-MS (100 to 250  $^{\circ}\text{C}$ , 15  $^{\circ}\text{C}/\text{min}$ ; Retention time: 19,800 min):  $m/z$  (%) = 245 ( $\text{M}+1$ , 15), 244 ( $\text{M}^+$ , 100), 243 (7), 217 (9), 216 (63), 215 (14), 173 (8), 130 (66), 115 (7), 115 (19), 103 (19), 86 (7), 77 (16), 60 (8).

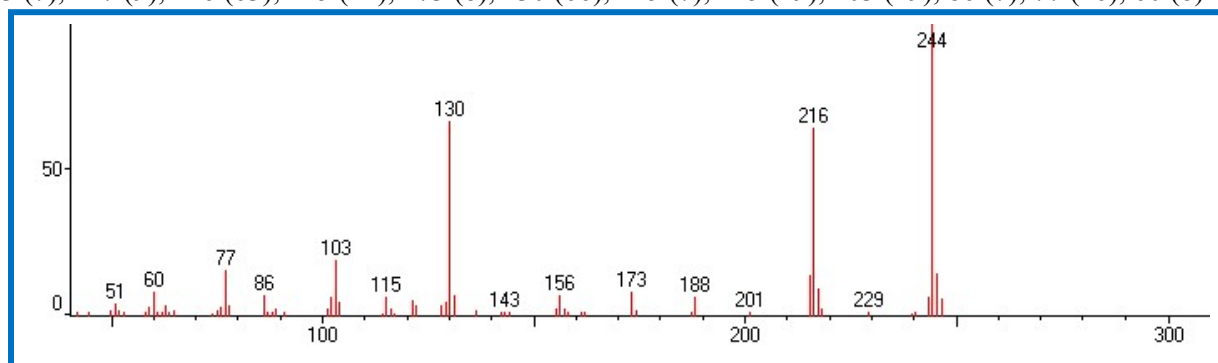

$^1\text{H-NMR}$  (400.16 Mhz, acetone- $d_6$ , 22 $^{\circ}\text{C}$ )  $\delta$  (ppm): 2.35 (s, 3H); 3.95 (s, 4H); 6.71 (s, 1H); 7.23 (d,  $J=8.10$  Hz, 2H); 8.04 (d;  $J=8.10$  Hz, 2H).

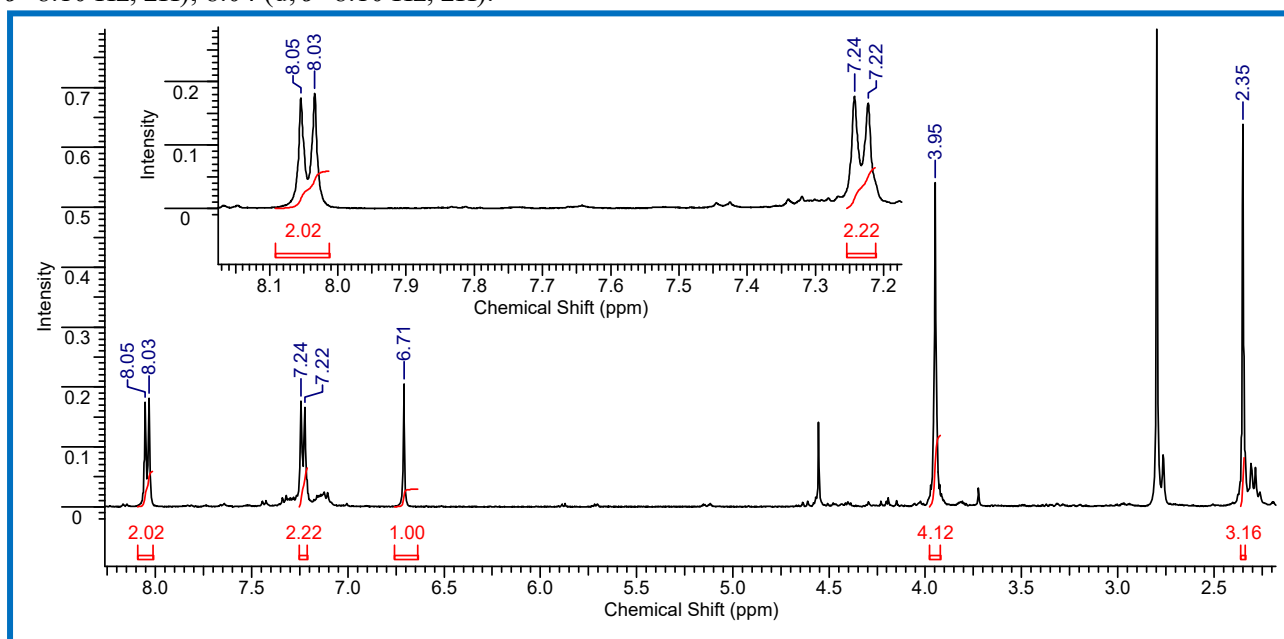



$^{13}\text{C}$ -NMR (100.56 MHz, acetone- $d_6$ )  $\delta$  (ppm): 21.48; 35.11; 41.61; 123.14; 130.09 (2C); 132.47 (2C); 132.68; 140.73; 145.59; 166.92; 171.52.

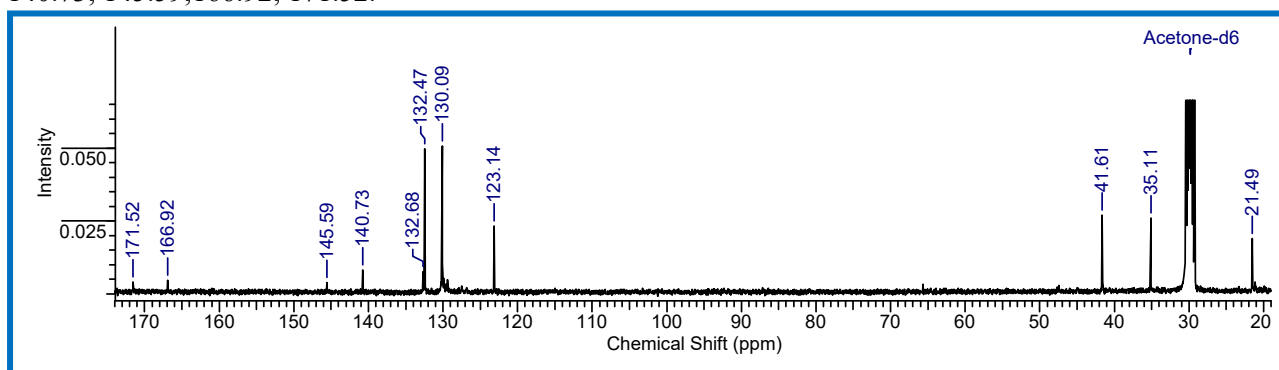

UV-Vis (ACN):  $\epsilon_{361} = 2.99 \cdot 10^4 \text{ M}^{-1} \text{ cm}^{-1}$ .

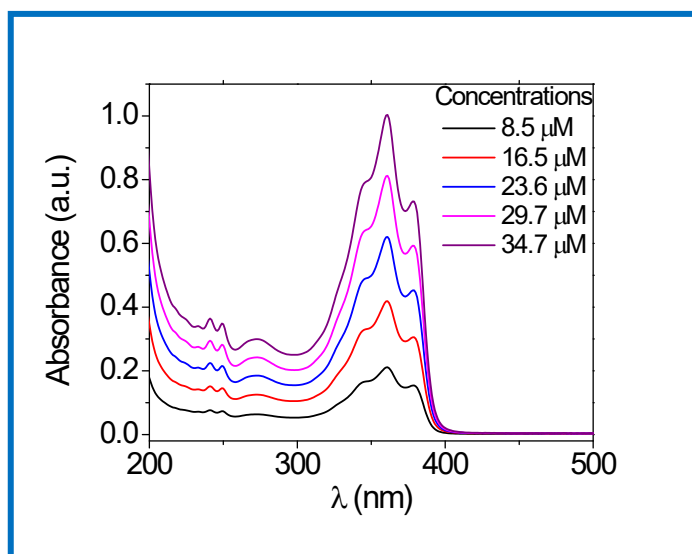

**Compound 2c.** 6-(4-fluorobenzylidene)-2,3-dihydroimidazo[2,1-*b*]thiazol-5(6*H*)-one.

GC-MS (150 to 250 °C, 15 °C/min; Retention time: 14.315 min):  $m/z$  (%) = 250 ( $M+2$ , 7), 249 ( $M+1$ , 17), 248 ( $M^+$ , 100), 221 (11), 220 (62), 219 (16), 165 (6), 160 (10), 140 (6), 135 (11), 134 (73), 108 (10), 86 (7), 107 (24), 86 (14), 60 (16), 43 (6).

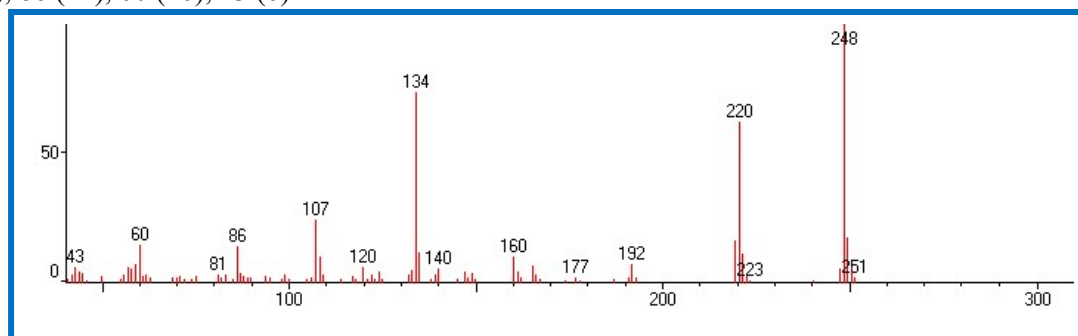

$^1\text{H-NMR}$  (400.16 MHz, acetone- $d_6$ , 22°C)  $\delta$  (ppm): 3.97 (s, 4H); 6.74 (s, 1H); 7.19 (t,  $J_1=8.86$  Hz, 2H); 8.24 (dd,  $J_1=8.86$  Hz,  $J_2=5.77$  Hz, 2H).

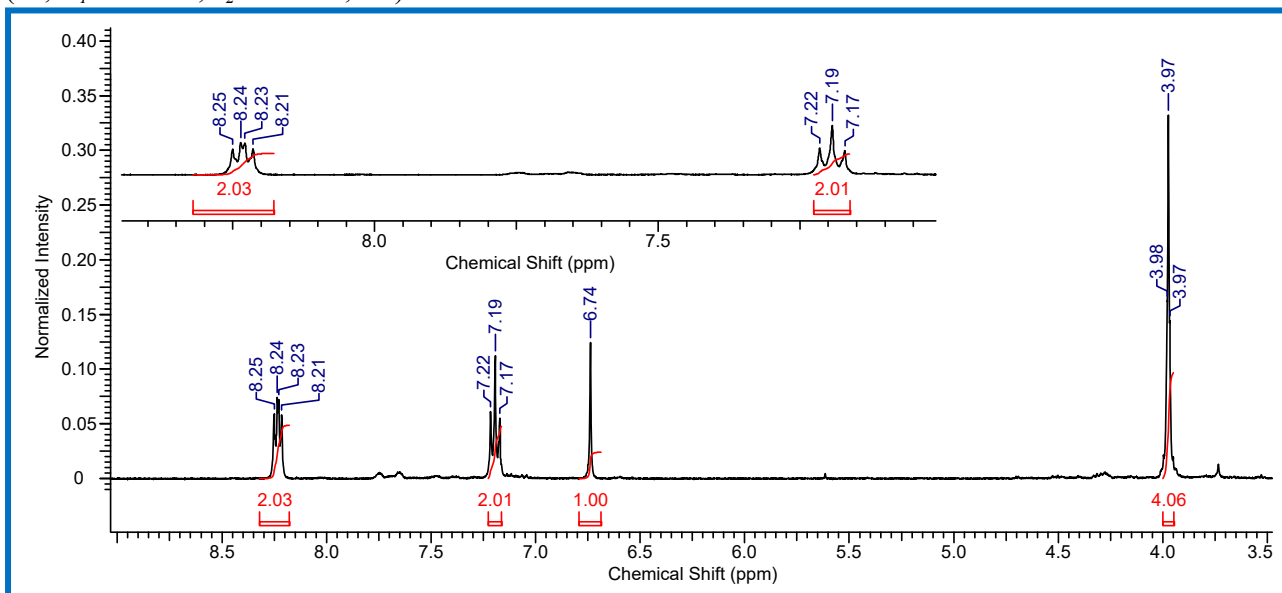

$^{13}\text{C-NMR}$  (100.56 MHz, acetone- $d_6$ )  $\delta$  (ppm): 35.17; 41.63; 164.08 ( $J_2^{-F}=21.88$  Hz, 2C); 121.57; 131.99 ( $J_4^{C-F}=3.70$  Hz); 134.47 ( $J_3^{C-F}=8.42$  Hz, 2C); 145.89; 164.08 ( $J_1^{C-F}=249.76$  Hz, 2C); 166.84; 172.47.

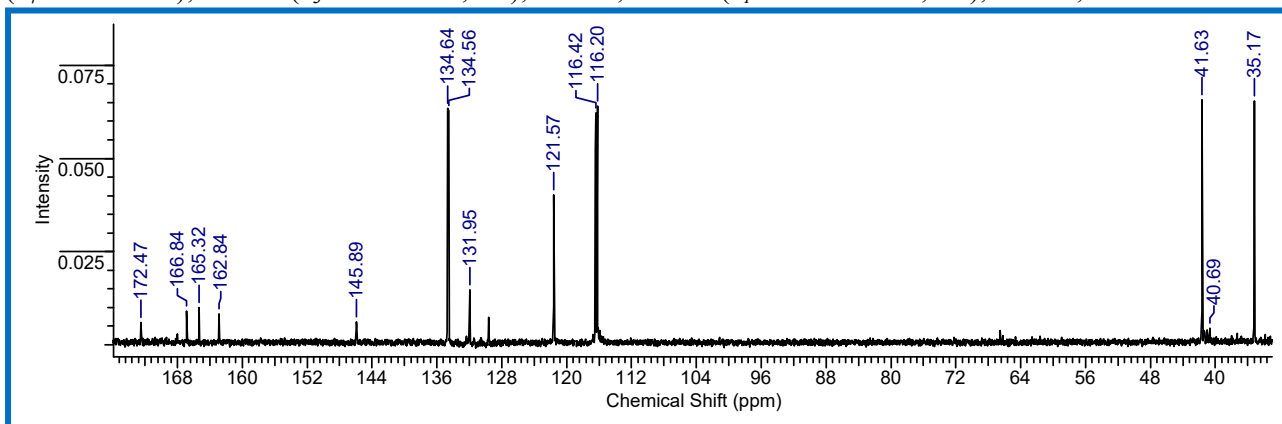

$^{19}\text{F-NMR}$  (376.53 MHz; acetone- $d_6$ )  $\delta$  (ppm): -111.91.

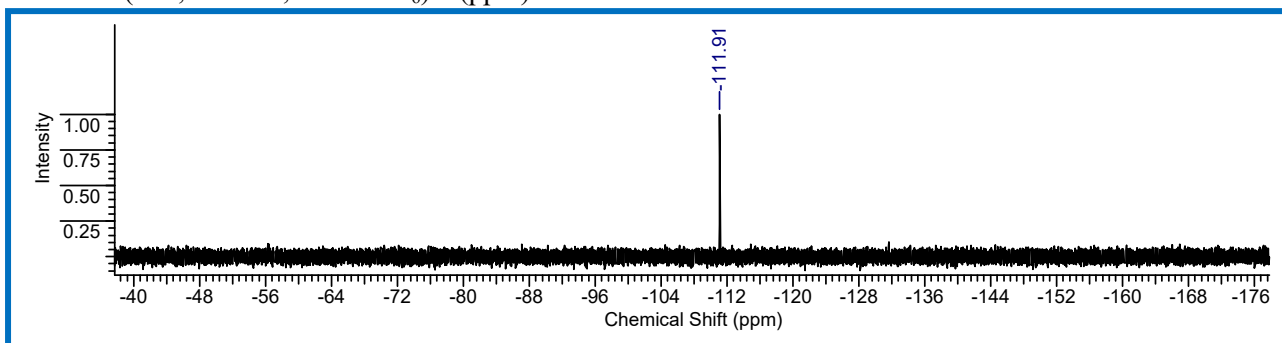

UV-Vis (ACN):  $\epsilon_{357} = 11.76 \cdot 10^4 \text{ M}^{-1} \text{ cm}^{-1}$ .

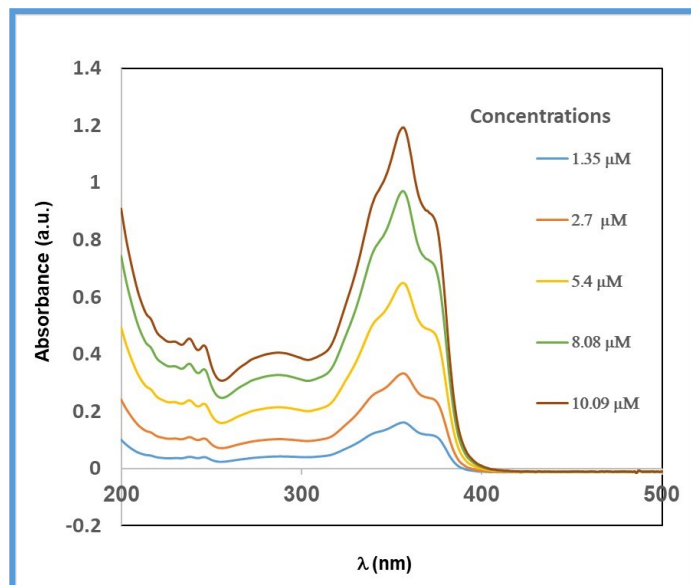

## 5. $^1\text{H-NMR}$ spectra in the photoisomerization

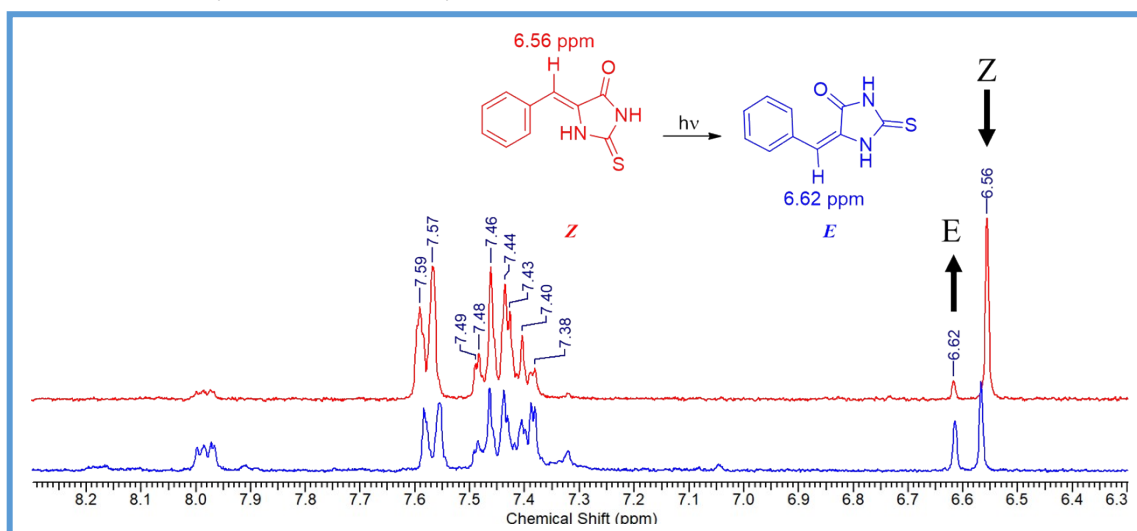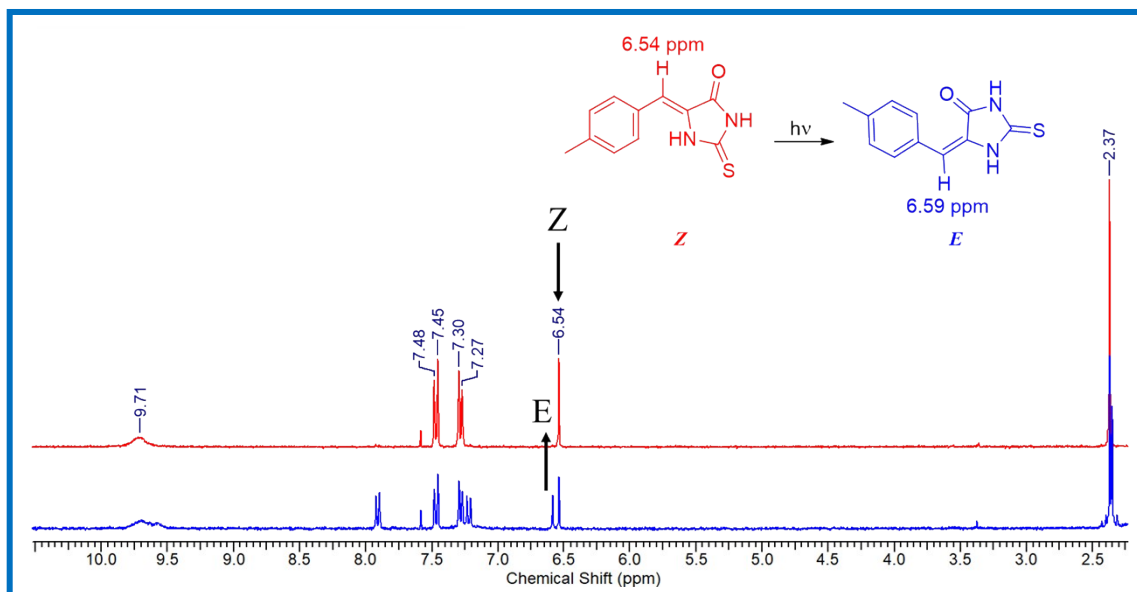

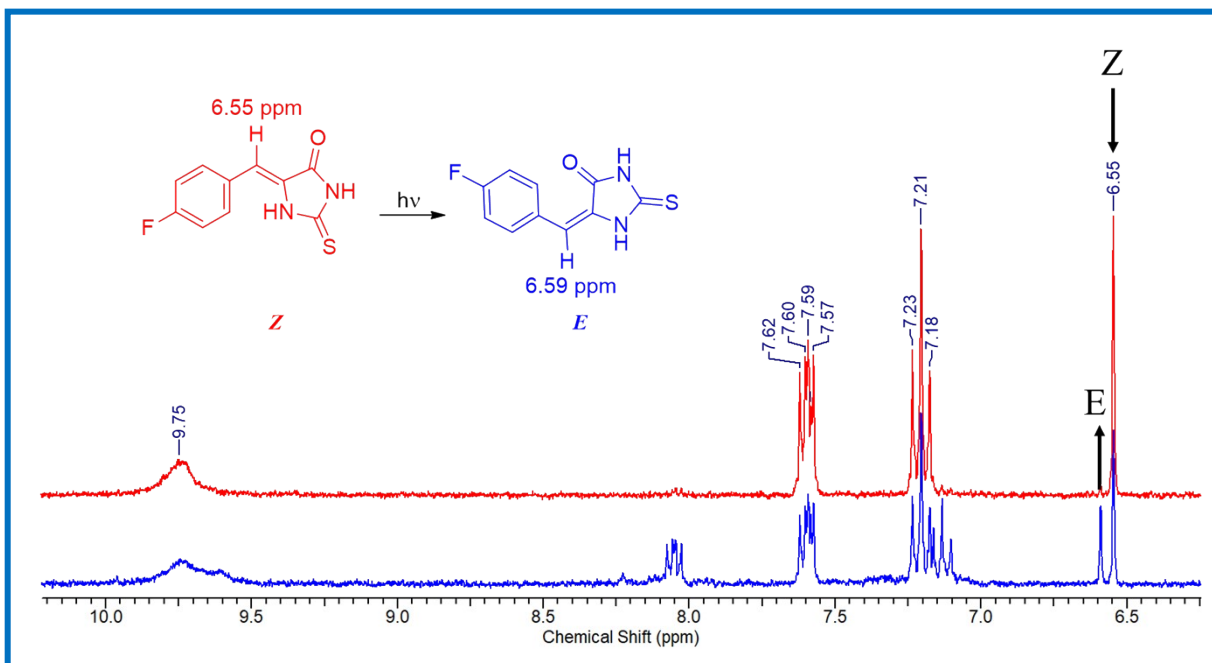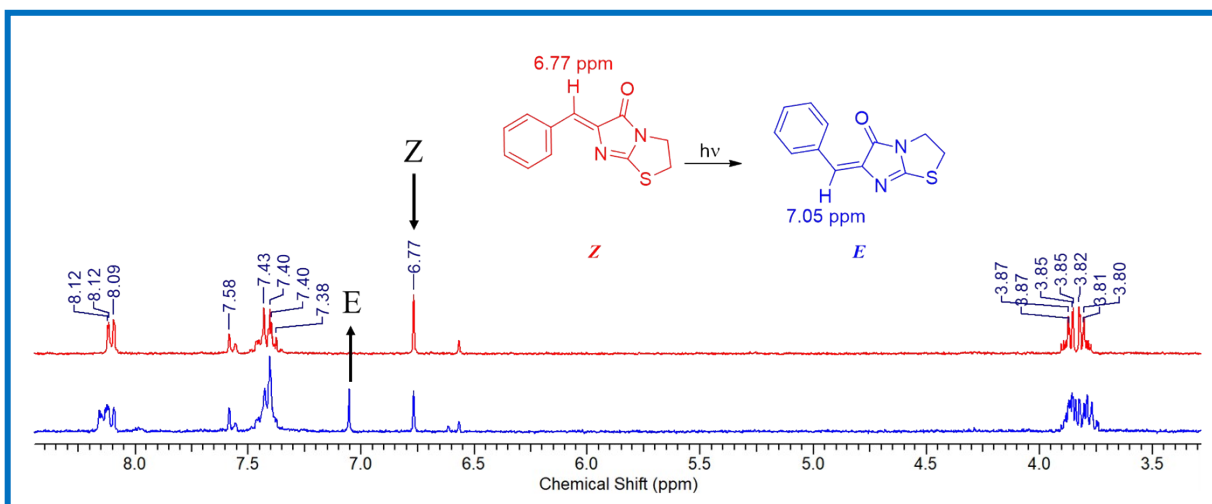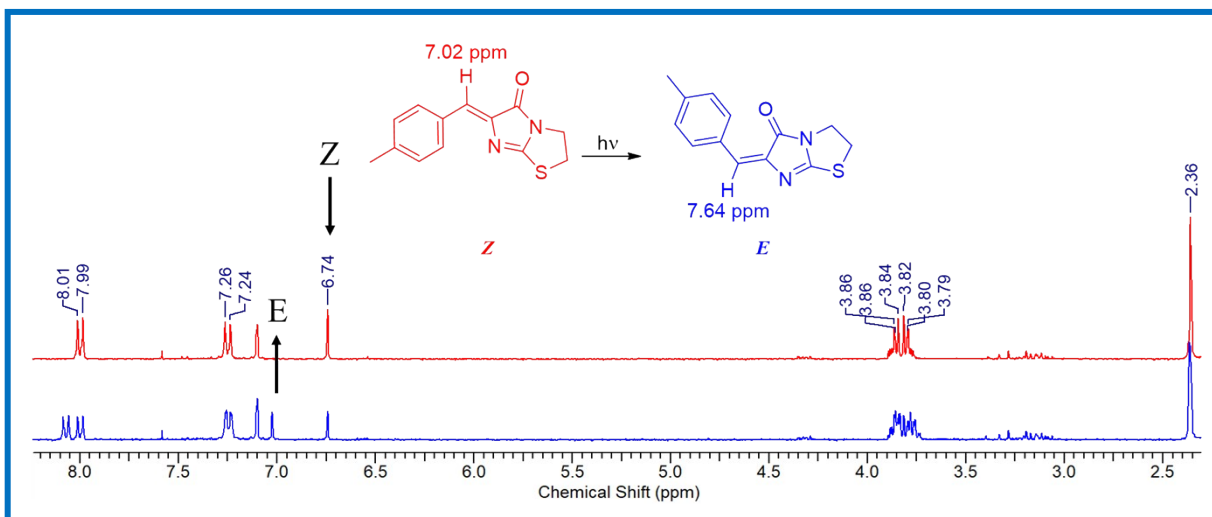

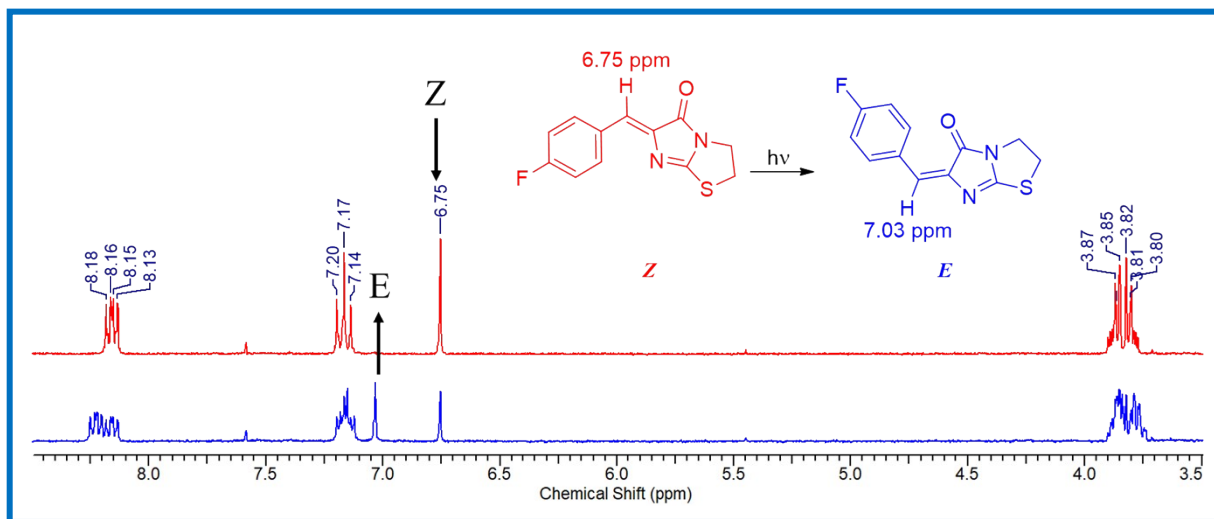

## 6. Thermal reversion

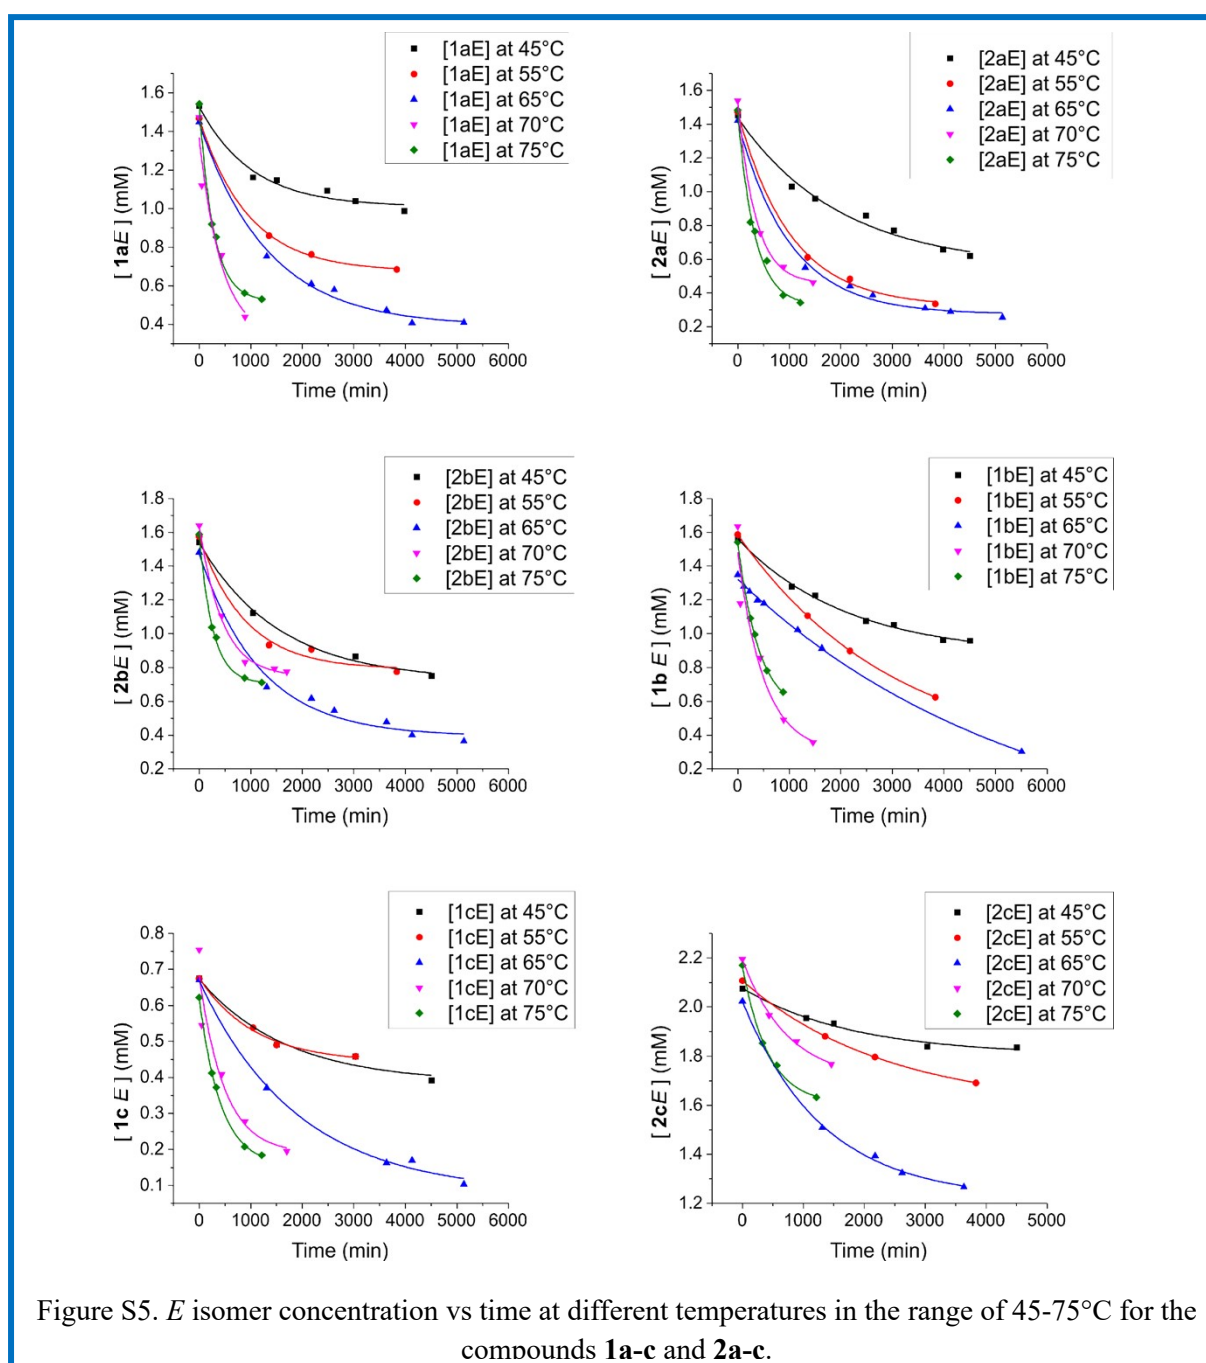

Figure S5. *E* isomer concentration vs time at different temperatures in the range of 45-75°C for the compounds **1a-c** and **2a-c**.

## 7. Equations employed in the data analysis

Eq. 1 Exponential decay  $[E] = [E]_0 e^{-k t}$

Eq. 2 Arrhenius equation  $\ln(k) = \ln(A) - \frac{Ea}{RT}$

Eq. 3 Activation entropy  $\Delta S^\ddagger = 4.575 \log A - \dots$

Eq. 4 Activation enthalpy  $\Delta H^\ddagger = Ea - RT$

Eq. 5 Free energy of activation  $\Delta G^\ddagger = \Delta H^\ddagger - T \Delta S^\ddagger$

## 8. Energy from B3LYP/6-311+G(d,p) and CAS(6/5)/6-31g(d)

DFT (6,311+G(d,p)) IN ACETONITRILE

| Compound   | E isomer hartree | Z isomer hartree | energia-TS-S0    | T1 minimum       | S0-ISC_I-T1      | S0-ISC_II-T1    | Z isomer kcalmol <sup>-1</sup> |
|------------|------------------|------------------|------------------|------------------|------------------|-----------------|--------------------------------|
| 1a T1-H    | - 969.015177100  | - 969.018776800  | - 968.916338900  | - 968.956858000  | - 968.956561200  | - 968.954272300 | - 2.258845555                  |
| 1b T3-CH3  | - 1008.343887000 | - 1008.347325000 | - 1008.254871000 | - 1008.285502000 | - 1008.285356000 | -1008.283697000 | - 2.157377286                  |
| 1c T4-F    | - 1068.284472000 | - 1068.287491000 | - 1068.185541000 | - 1068.225705000 | - 1068.225508000 | -1068.223061000 | - 1.894450851                  |
| 2a T1c-H   | - 1046.421851000 | - 1046.427757000 | - 1046.344551000 | - 1046.364513000 | - 1046.364482000 | -1046.364261000 | - 3.706070463                  |
| 2b T3c-CH3 | - 1085.750419000 | - 1085.756151000 | - 1085.672138000 | - 1085.692886000 | - 1085.692769000 | -1085.692876000 | - 3.596883829                  |
| 2c T4c-F   | - 1145.691324000 | - 1145.697150000 | - 1145.585871000 | - 1145.633557000 | - 1145.633470000 | -1145.633469000 | - 3.655869712                  |

DFT (6,311+G(d,p)) IN ACETONITRILE

| Compound   | Ea-ST-S0 kcalmol <sup>-1</sup> | DH <sup>‡</sup> -ST-S0 | DG <sup>‡</sup> -ST-S0 | DS <sup>‡</sup> -ST-S0 | T1 minimum kcalmol <sup>-1</sup> | S0 to ISC_I-T1 kcalmol <sup>-1</sup> | S0 to ISC_II-T1 kcalmol <sup>-1</sup> | DH <sup>‡</sup> to ISC_II-T1 kcalmol <sup>-1</sup> | DG <sup>‡</sup> to ISC_II-T1 kcalmol <sup>-1</sup> | DS <sup>‡</sup> to ISC_II-T1 ue |
|------------|--------------------------------|------------------------|------------------------|------------------------|----------------------------------|--------------------------------------|---------------------------------------|----------------------------------------------------|----------------------------------------------------|---------------------------------|
| 1a T1-H    | 62.021898689                   | 60.188818257           | 60.258471799           | -0.234000000           | 36.595782925                     | 36.782027712                         | 38.218333957                          | 36.92077004                                        | 35.7429349                                         | 3.951                           |
| 1b T3-CH3  | 55.858375949                   | 54.568216641           | 54.934054616           | -3.215000000           | 36.637135794                     | 36.728752165                         | 37.769790244                          | 37.0556846                                         | 35.4348278                                         | 3.451                           |
| 1c T4-F    | 63.974582412                   | 60.275414552           | 60.914219113           | -2.145000000           | 36.876844381                     | 37.000463731                         | 38.535979211                          | 37.27280281                                        | 36.1332458                                         | 3.821                           |
| 2a T1c-H   | 48.506475924                   | 48611.202849092        | 48613.210251634        | -0.234000000           | 35.980133461                     | 35.999586252                         | 36.138265828                          | 34.57953250                                        | 32.8225062                                         | 5.892                           |
| 2b T3c-CH3 | 49.122062637                   | 48604.917715032        | 48607.943565315        | -3.215000000           | 36.102497792                     | 36.175916391                         | 36.108772886                          | 34.5676098                                         | 33.0961003                                         | 4.935                           |
| 2c T4c-F   | 66.172747809                   | 48611.390474400        | 48613.877921626        | -2.145000000           | 36.249334990                     | 36.303928307                         | 36.304555816                          | 34.80418086                                        | 33.0684899                                         | 5.819                           |

DFT (6,311+G(d,p)) IN GAS PHASE

| Compound   | E isomer hartree | Z isomer hartree | energia-TS-S0     | Z isomer kcalmol <sup>-1</sup> | Ea-ST-S0 kcalmol <sup>-1</sup> |
|------------|------------------|------------------|-------------------|--------------------------------|--------------------------------|
| 1a T1-H    | - 969.000539700  | - 969.004516100  | - 968.880713200   | - 2.495228342                  | 75.192254041                   |
| 1b T3-CH3  | - 1008.329042000 | - 1008.332843000 | - 1.008.227882000 | - 2.385163195                  | 63.478849994                   |
| 1c T4-F    | - 1068.269247000 | - 1068.272245000 | - 1.068.149144000 | - 1.881273154                  | 75.365760387                   |
| 2a T1c-H   | -1046.408577     | -1046.414033     | -1046.331316      | -3.423691237                   | 48.48200306                    |
| 2b T3c-CH3 | -1085.736932     | -1085.742203     | -1085.651986      | -3.307602                      | 53.30441273                    |
| 2c T4c-F   | -1145.67788      | -1145.683226     | -1145.565228      | -3.354665204                   | 70.69018791                    |

CAS(6/5)/6-31g(d) IN GAS PHASE

| Compound   | E isomer hartree | Z isomer hartree | energia-TS-S0    | Z isomer kcalmol | Ea-ST-S0 kcalmol <sup>-1</sup> |
|------------|------------------|------------------|------------------|------------------|--------------------------------|
| 1a T1-H    | -964.672365      | -964.6633498     | -964.5320232     | 5.657122662      | 88.06579745                    |
| 1b T3-CH3  | -1003.709886     | -1003.700617     | -1003.57365      | 5.816384545      | 85.48936939                    |
| 1c T4-F    | -1063.508503     | -1063.540787     | -1063.400176     | -20.25851318     | 67.9762098                     |
| 2a T1c-H   | -1041.54021      | -1041.542734     | -1041.446759     | -1.583833703     | 58.6413801                     |
| 2b T3c-CH3 | -1080.587877     | -1080.580028     | -1080.473498     | -4.92532121      | 66.84857542                    |
| 2c T4c-F   | -1140.401756     | -1140.4082       | - 1140.267043000 | -4.043670516     | 84.53367259                    |

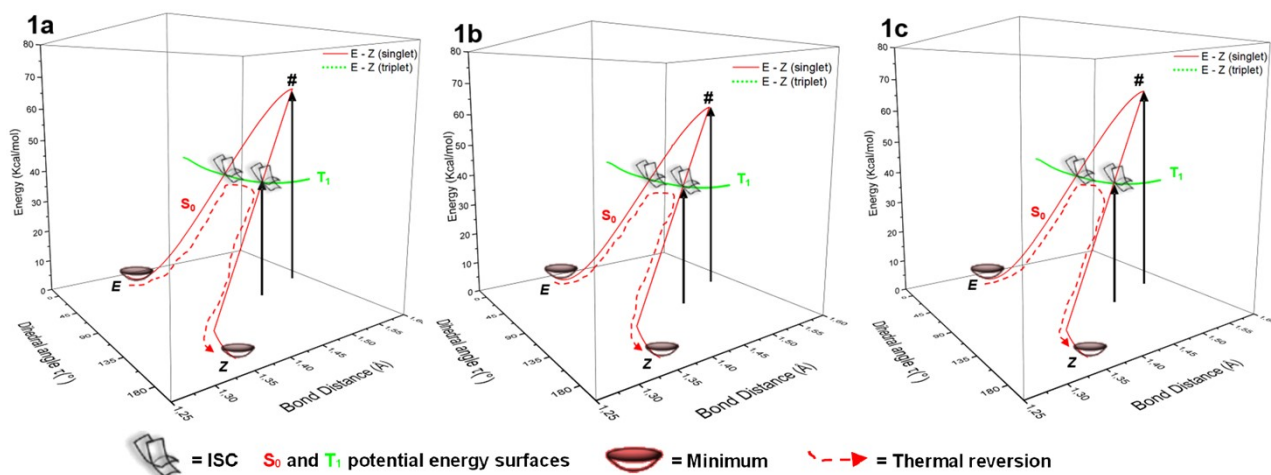

Figure S6. S<sub>0</sub> and T<sub>1</sub> potential energy surfaces (PES) obtained for compounds **1a-c**. B3LYP/6-311+g(d,p) in acetonitrile.

**1a**

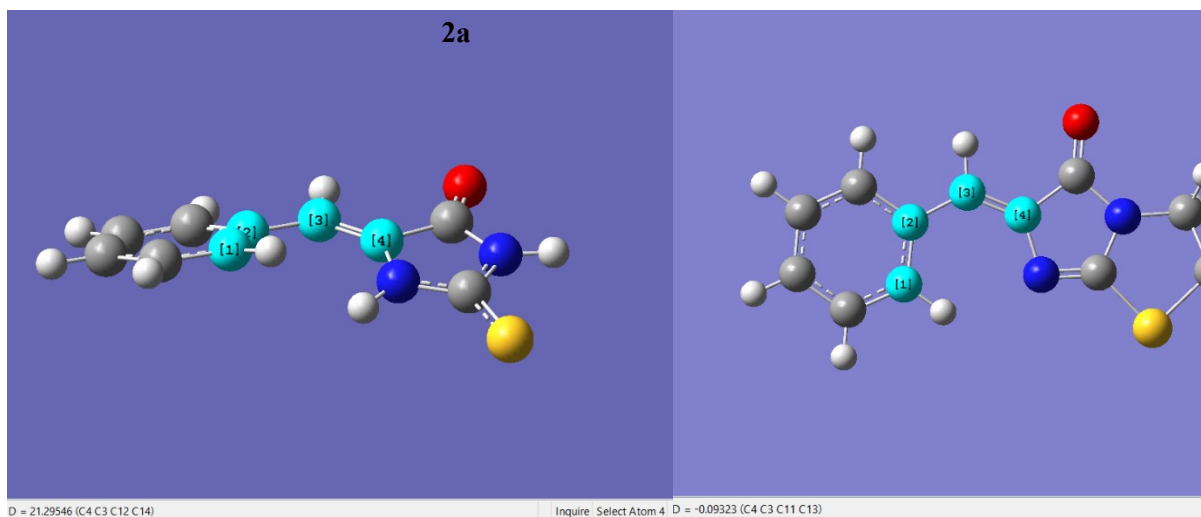

Figure S7. Dihedral angles of the styryl moiety for compounds **1a** and **2a** respectively (B3LYP/6-311+g(d,p)).
