# Supplementary material for: GFP-related chromophores: photoisomerization, thermal reversion, and DNA labelling
Source: Royal Society of Chemistry journal article supplement (doi:10.1039/d3cp01655b), 2023-01-01

Electronic Supplementary Material (ESI) for Physical Chemistry Chemical Physics.  
This journal is © the Owner Societies 2023

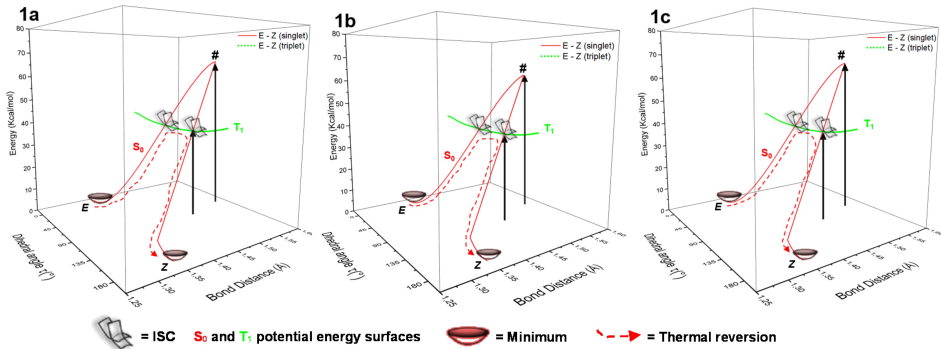

Supplement: d3cp01655b4.pdf [file d3cp01655b4.pdf]
