# Supplementary figures and images for: GFP-related chromophores: photoisomerization, thermal reversion, and DNA labelling
Source: Royal Society of Chemistry journal article supplement (doi:10.1039/d3cp01655b), 2023-01-01

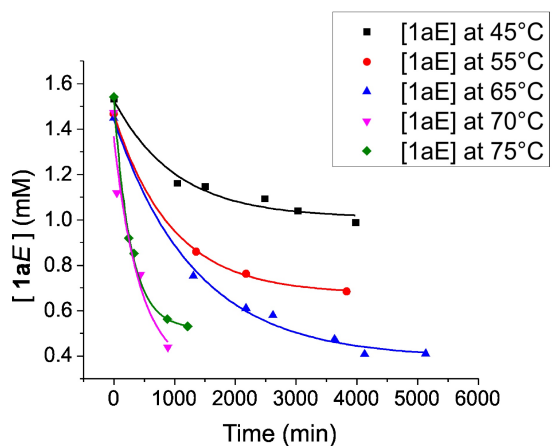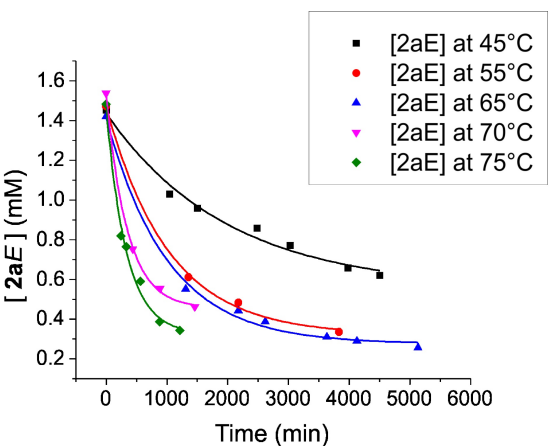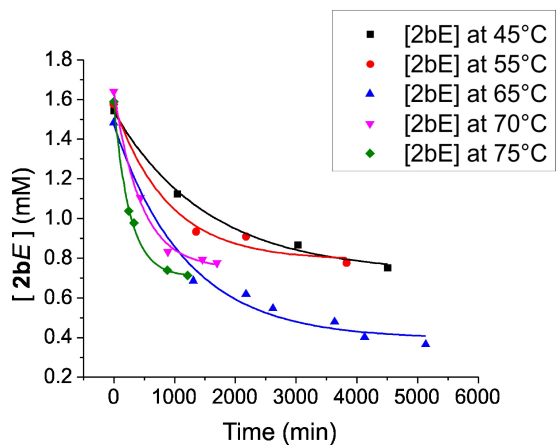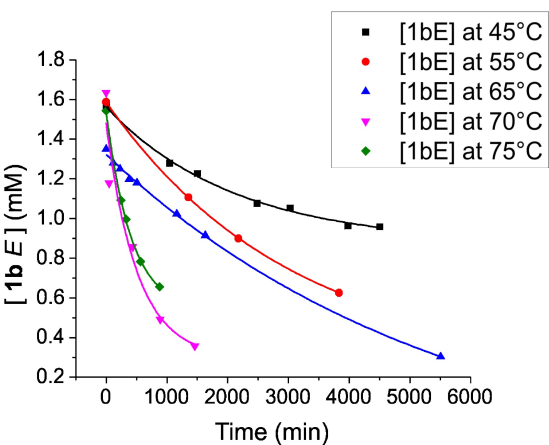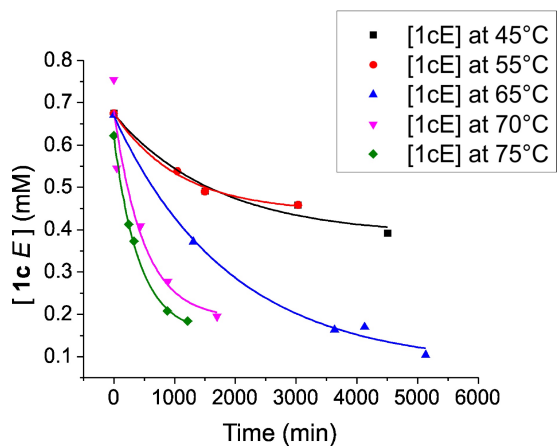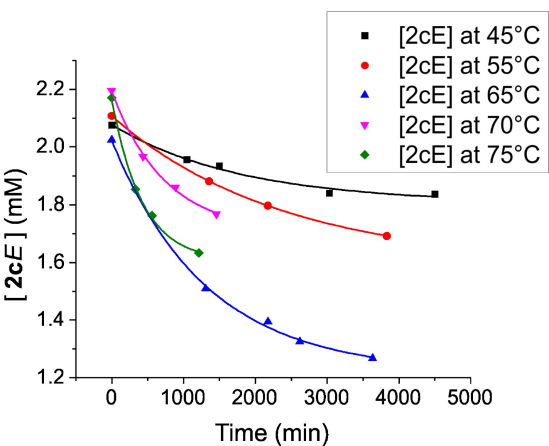

Supplement: d3cp01655b3.pdf [file d3cp01655b3.pdf]
